# Supplementary material
Source: Springer Nature journal article supplement (https://www.springermedizin.de/resource/supplementary/12902_2012_123_MOESM6_ESM.pdf/9515594)
Supplement: MOESM6 [file 9515594]

# Myocardial Infarction

Odds ratio and 95% CI

|                          | Odds ratio | Lower limit | Upper limit | p-Value |
|--------------------------|------------|-------------|-------------|---------|
| Gaziano, 1997            | 2.70       | 1.36        | 5.35        | 0.00    |
| Jonsdottir, 2002 (men)   | 1.21       | 1.08        | 1.36        | 0.00    |
| Jonsdottir, 2002 (women) | 1.40       | 1.15        | 1.70        | 0.00    |
| Lu, 2003                 | 2.04       | 1.12        | 3.70        | 0.02    |
| Malone, 2009             | 1.17       | 1.08        | 1.27        | 0.00    |
| Noda, 2010               | 1.46       | 0.89        | 2.39        | 0.13    |
|                          | 1.31       | 1.15        | 1.49        | 0.00    |

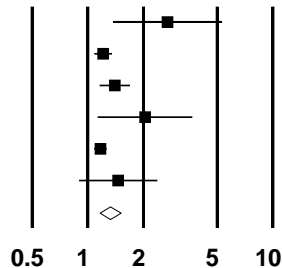

Decreased risk with hypertriglyceridemia

Increased risk with hypertriglyceridemia
